# Supplementary material for: Interface engineering of Co 2 B–MoO 3 /MOF heterojunctions with rich cobalt defects for highly enhanced NaBH 4 hydrolysis
Source: Royal Society of Chemistry journal article supplement (doi:10.1039/d4qi01721h), 2024-01-01
Supplement: d4qi01721h1.pdf [file d4qi01721h1.pdf]

## *Supporting Information*

### **Interface engineering of Co<sub>2</sub>B-MoO<sub>3</sub>/MOF heterojunction with rich cobalt defects for highly enhanced NaBH<sub>4</sub> hydrolysis**

Chenxi Shang <sup>a</sup>, Luyan Shi <sup>a</sup>, Shuqing Zhou <sup>a</sup>, Sheraz Muhammad <sup>a</sup>, Tayirjan Taylor Isimjan <sup>b</sup>,

<sup>\*</sup>, Huancheng Hu <sup>a, \*</sup>, Xiulin Yang <sup>a, \*</sup>

<sup>a</sup> *Guangxi Key Laboratory of Low Carbon Energy Materials, School of Chemistry and Pharmaceutical Sciences, Guangxi Normal University, Guilin 541004, China*

<sup>b</sup> *Saudi Arabia Basic Industries Corporation (SABIC) at King Abdullah University of Science and Technology (KAUST), Thuwal 23955-6900, Saudi Arabia*

*\* Corresponding author.*

*E-mail address: xlyang@gxnu.edu.cn (X. Yang), isimjant@sabic.com (T.T. Isimjan), siniantongnian@126.com (H. Hu)*

## 1. Experimental section

### *Materials*

Cobalt nitrate hexahydrate ( $\text{Co}(\text{NO}_3)_2 \cdot 6\text{H}_2\text{O}$ ,  $\geq 99.0\%$ , Aladdin), cobalt chloride hexahydrate ( $\text{CoCl}_2 \cdot 6\text{H}_2\text{O}$ ,  $\geq 99.0\%$ , Aladdin), sodium borohydride ( $\text{NaBH}_4$ ,  $\geq 98.0\%$ , Sinopharm Group), sodium hydroxide ( $\text{NaOH}$ ,  $\geq 96.0\%$ , Aladdin), urea ( $\text{H}_2\text{NCONH}_2$ ,  $\geq 99.0\%$ , Aladdin), ethanol ( $\text{C}_2\text{H}_6\text{O}$ ,  $\geq 99.7\%$ , Xilong Scientific), sodium molybdate dihydrate ( $\text{Na}_2\text{MoO}_4 \cdot 2\text{H}_2\text{O}$ ,  $\geq 99.0\%$ , Xilong Scientific), ammonium acetate ( $\text{CH}_3\text{COONH}_4$ ,  $\geq 98.0\%$ , Xilong Scientific), N,N-Dimethylformamide (DMF) and Trimesic acid-1,3,5-Benzenetricarboxylic acid ( $\text{C}_9\text{H}_6\text{O}_6$  ( $\text{H}_3\text{BTC}$ ),  $\geq 98\%$ , Aladdin). All reagents were commercially available and could be used directly without further purification. All aqueous solutions were prepared with deionized water.

### *Synthesis of Co-BTC (MOF)*

This study synthesized Co-BTC using the conventional method, as previously reported in the literature.<sup>1</sup> Initially, 2 mmol  $\text{Co}(\text{NO}_3)_2 \cdot 6\text{H}_2\text{O}$  and 0.7 mmol trimesic acid were mixed in 10 mL of DMF and stirred for 10 min. Subsequently, 5 mL of 1 M ammonium acetate solution was added, stirring the mixture for 30 min. The mixture was then transferred to a 20 mL Teflon-lined autoclave and maintained at 150 °C for 24 h. After cooling to room temperature and being washed thrice with DMF, the product was centrifuged and dried in a 60 °C oven overnight to produce Co-BTC (In the subsequent synthetic sections of this article, when Co-BTC serves as a carrier, we represent it with MOF).

### *Synthesis of $\text{Co}_2\text{B-MoO}_3/\text{MOF}$*

Co<sub>2</sub>B-MoO<sub>3</sub>/MOF heterojunction materials were prepared using incipient wet impregnation and NaBH<sub>4</sub> reduction methods. First, 30 mg of MOF was dispersed in 10 mL of ethanol by sonication. Then, CoCl<sub>2</sub>·6H<sub>2</sub>O and Na<sub>2</sub>MoO<sub>4</sub>·2H<sub>2</sub>O were added into the suspension and stirred for 1 h. The solvent was then evaporated under a vacuum, obtaining Co<sup>2+</sup>/Mo<sup>6+</sup>-MOF. The Co<sup>2+</sup>/Mo<sup>6+</sup>-MOF was mixed with 0.8 g urea in a mortar and ground manually. Next, 4 mmol of NaBH<sub>4</sub> was added and uniformly dispersed into the mortar, grinding by hand until the mixture turned black. The mixture was then transferred to a glass vessel, and an appropriate amount of deionized water was added. The obtained samples were centrifuged, washed three times with water and alcohol, and vacuum-dried at 60 °C for 12 h. For comparison, while maintaining the total mass of the metal salt at 0.14 g, other Co<sub>2</sub>B-MoO<sub>3</sub>/MOF composites were prepared by varying the Co/Mo molar ratio (1:1, 4:1, 6:1, 13:1, 20:1) during the synthesis process. The MoB/MOF and Co<sub>2</sub>B-Co/MOF were prepared using the same method without adding CoCl<sub>2</sub>·6H<sub>2</sub>O or Na<sub>2</sub>MoO<sub>4</sub>·2H<sub>2</sub>O. Similarly, Co<sub>2</sub>B was synthesized through the same procedure, excluding Na<sub>2</sub>MoO<sub>4</sub>·2H<sub>2</sub>O and MOF.

## **2. Physical characterization**

The structural integrity of samples was analyzed by X-ray diffraction (XRD, Rigaku 13 D/Max 2500 V/PC, Japan). The specific surface and pore size distribution of catalysts were calculated by Brunauer-Emmett-Teller (BET) and the Barrett-Joyner-Halenda (BJH) methods, respectively. The surface valence of material was analyzed by X-ray photoelectron spectroscopy (XPS, JPS-9010 Mg K $\alpha$ ). Zeta potential was determined on a Litesizer 500. The field-emission scanning electron microscopy (SEM, FEI Quanta 200 FEG) and transmission electron microscopy (TEM, JEM-2100F) were used to characterize the morphology and

microstructure of samples. The water contact angle was investigated using an optical contact angle meter (Dataphysics-OCA20). Electron paramagnetic resonance (EPR) spectra were measured by Bruker E500 spectrometer. Metal contents were investigated by inductively coupled plasma mass spectroscopy (ICP-MS, PekinElmer corporation, FLEXAR-NEXION300X). The work function (WF) was acquired by ultraviolet photoelectron spectroscopy (UPS). Using a He (I) discharge lamp emitting the He photoelectron line (21.22 eV), the cutoff energy ( $E_{cutoff}$ ), valence band maximum ( $E_v$ ), and Fermi level ( $E_f$ ) were extracted from the UPS spectra. The Ag layer acted as a reference to measure the kinetic energy corresponding to the  $E_f$  and then the  $E_f$  was corrected to 0 eV.

The WF was calculated according to equation.<sup>2</sup> :  $WF = 21.22 - E_{cutoff}$

### 3. Catalytic measurements

The catalytic activity, reusability, and activation energy of the catalytic materials were determined using the following test methods. Typically, a 25 mL mixture solution (containing 150 mM NaBH<sub>4</sub> + 0.4 wt.% NaOH) was kept in a three-necked round-bottom flask (50 mL), and maintained it in a water bath at 25 °C. The volume of H<sub>2</sub> is monitored by a computer-connected drainage system, which records instantaneous changes in water volume. The catalytic reaction was started when the catalyst was added to the flask under constant magnetic stirring conditions. Five consecutive cycling tests were conducted at 25 °C to assess the reusability of the catalyst. We used fresh NaBH<sub>4</sub> solution instead of fully decomposed NaBH<sub>4</sub>. After each reusability test, we centrifuged the catalytic material, washed it several times using deionized water and anhydrous ethanol, dried it under vacuum at room temperature, and weighed the catalytic material for the next cycle experiment. All

performance tests were performed three times under the same conditions, and the experimental results were averaged to ensure accuracy. The activation energy of the designed catalysts was evaluated in the temperature range of 25 ~ 45 °C using the same apparatus.

#### 4. Calculation of catalytic performance

(1) The hydrogen production rate of the catalyst at different temperatures was analyzed by applying the Arrhenius equation and the following equation was derived:

$$\ln \kappa = \ln A - E_a/RT \quad (1)$$

Where  $\kappa$  (L min<sup>-1</sup> g<sup>-1</sup>) is the rate coefficient, A (L min<sup>-1</sup> g<sup>-1</sup>) is a constant,  $E_a$  (kJ mol<sup>-1</sup>) is the activation energy, R (8.314 J mol<sup>-1</sup> K<sup>-1</sup>) is the universal gas constant, and T (K) is testing temperature.

(2) The specific H<sub>2</sub> generation rate (HGR) is calculated as follows:

$$\text{HGR} = \frac{V_{\text{H}_2\text{O}} \text{ (mL)}}{t \text{ (min)} \times m \text{ (g)}} \quad (2)$$

Where  $V_{\text{H}_2\text{O}}$  denotes the drainage volume, m refers to the catalyst mass, and t is the reaction time.

#### 5. Supplementary Figures and Table

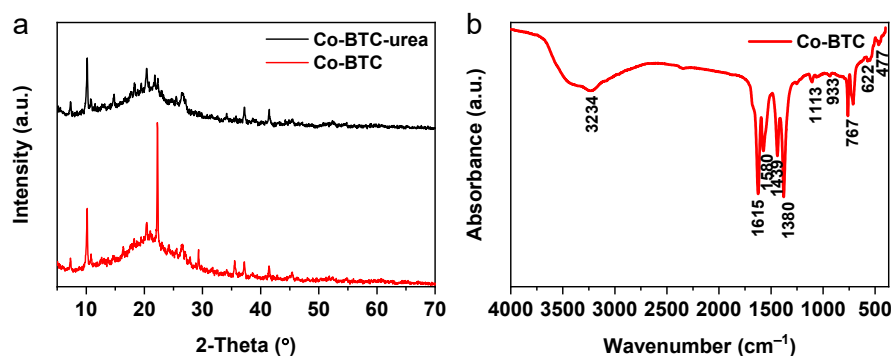

**Fig. S1.** (a) XRD patterns of Co-BTC-urea. (b) FT-IR spectra of Co-BTC.

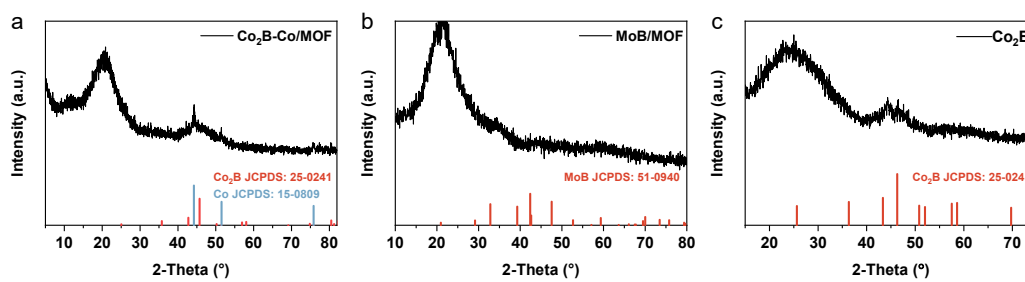

**Fig. S2.** XRD patterns of (a)  $\text{Co}_2\text{B-Co/MOF}$ , (b)  $\text{MoB/MOF}$ , and (c)  $\text{Co}_2\text{B}$ .

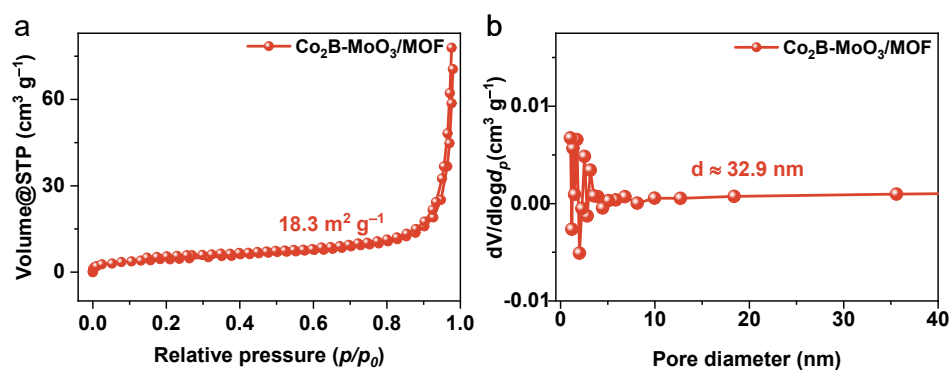

**Fig. S3.** (a)  $\text{N}_2$  adsorption/desorption isotherm and (b) the corresponding pore size distribution of  $\text{Co}_2\text{B-MoO}_3/\text{MOF}$ .

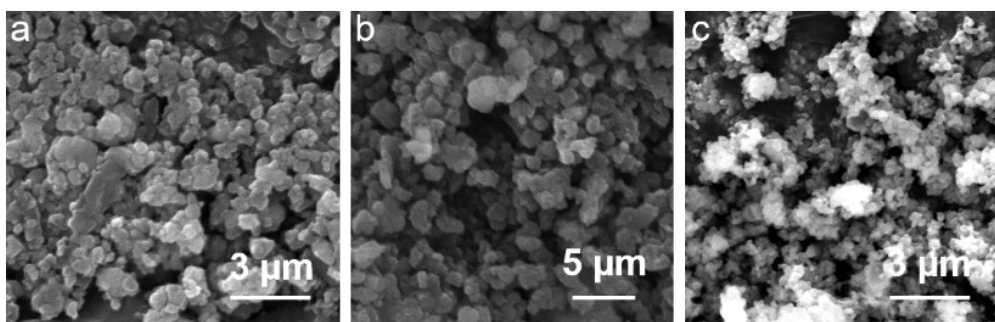

**Fig. S4.** SEM images of (a)  $\text{Co-BTC}$ , (b)  $\text{Co}_2\text{B-Co/MOF}$ , and (c)  $\text{Co}_2\text{B}$ .

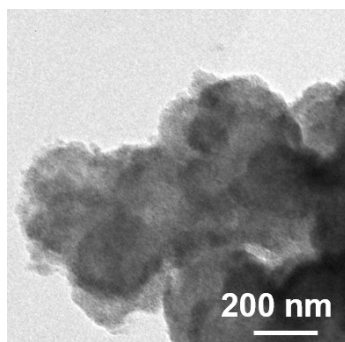

**Fig. S5.** TEM image of Co<sub>2</sub>B-Co/MOF.

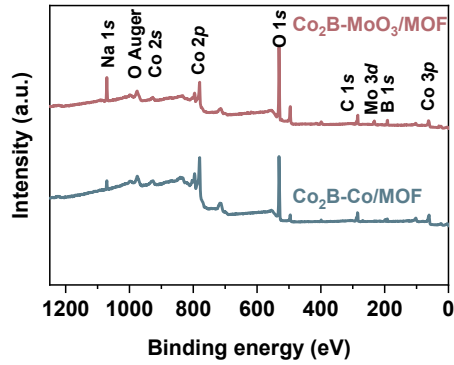

**Fig. S6.** XPS survey spectra of Co<sub>2</sub>B-MoO<sub>3</sub>/MOF and Co<sub>2</sub>B-Co/MOF.

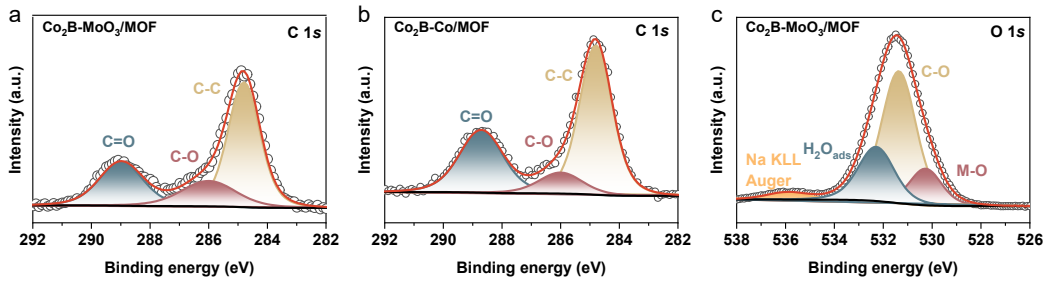

**Fig. S7.** High-resolution XPS spectra of C 1s of (a) Co<sub>2</sub>B-MoO<sub>3</sub>/MOF and (b) Co<sub>2</sub>B-Co/MOF. (c) O 1s for Co<sub>2</sub>B-MoO<sub>3</sub>/MOF.

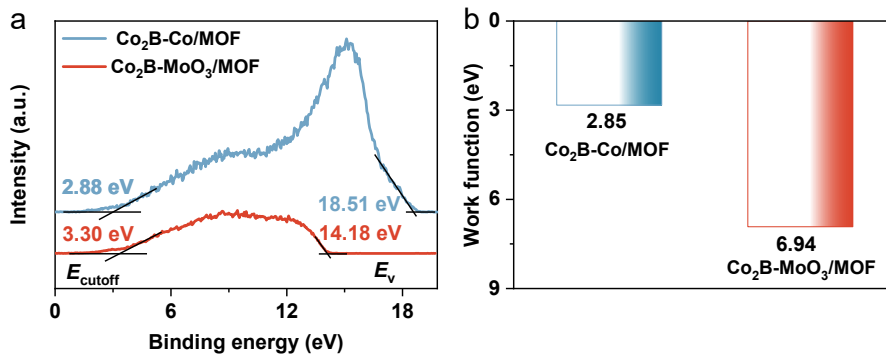

**Fig. S8.** (a) UPS spectra and (b) work functions of the different catalysts.

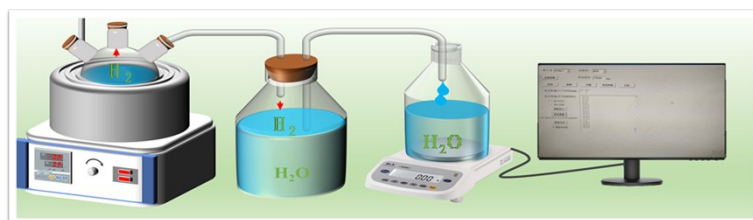

**Fig. S9.** Schematic diagram of the setup for  $\text{H}_2$  production by hydrolysis of 150 mM  $\text{NaBH}_4$  + 0.4 wt.%  $\text{NaOH}$  solution.

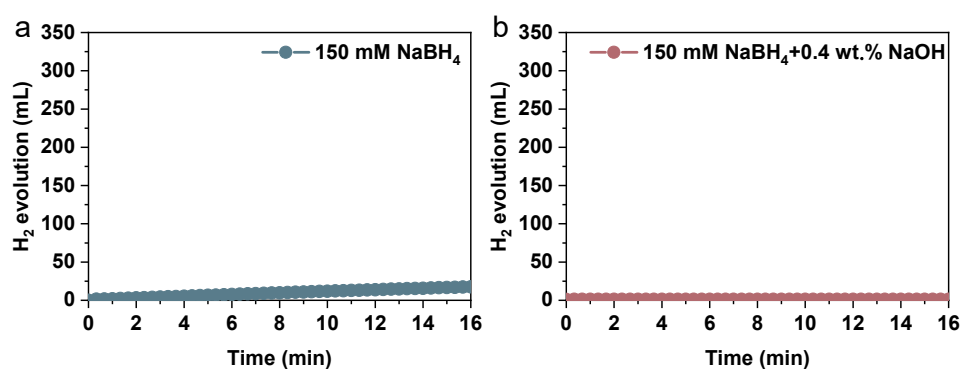

**Fig. S10.** (a) Self-hydrolysis of  $\text{NaBH}_4$  study of 150 mM  $\text{NaBH}_4$  solution at 25 °C. (b) Self-hydrolysis of  $\text{NaBH}_4$  study of 150 mM  $\text{NaBH}_4$  + 0.4 wt.%  $\text{NaOH}$  solution at 25 °C.

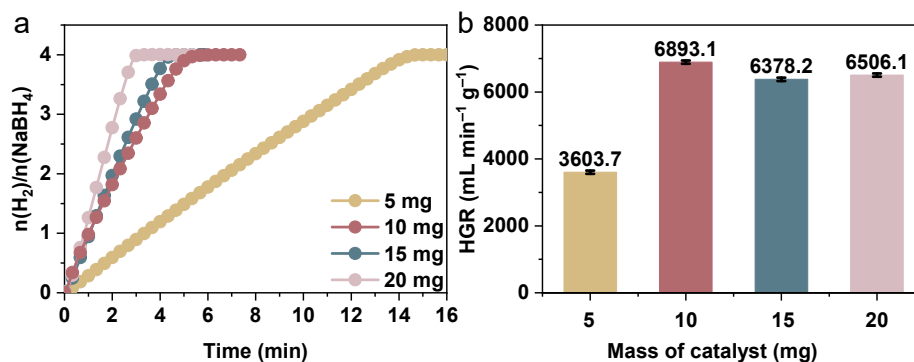

**Fig. S11.** (a) The equivalent  $\text{H}_2$  per mole of sodium borohydride versus time with different mass of catalyst and (b) the corresponding HGR values. All tests were performed at 298 K.



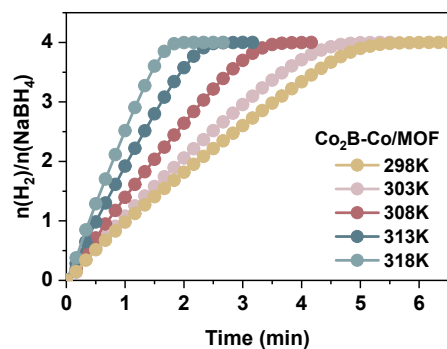

**Fig. S12.** The relationship between the H<sub>2</sub> generation rate and applied temperatures of Co<sub>2</sub>B-Co/MOF for alkalized NaBH<sub>4</sub> hydrolysis.

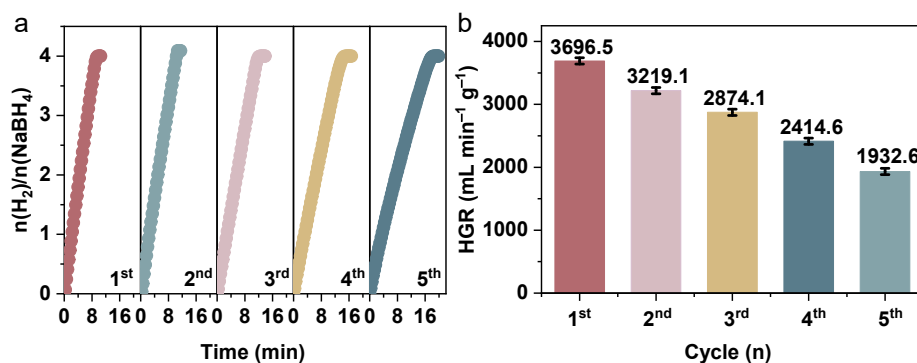

**Fig. S13.** (a) Reusability test of Co<sub>2</sub>B-Co/MOF catalyst in alkaline NaBH<sub>4</sub> solution at 25 °C and (b) the corresponding HGR values in the different cycle.

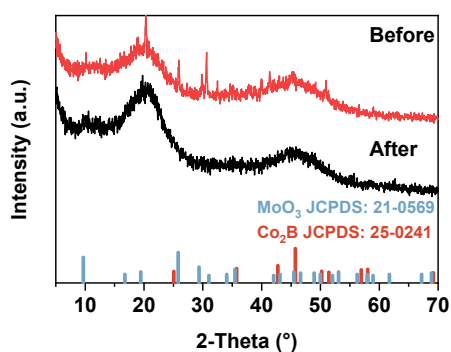

**Fig. S14.** XRD patterns before and after catalyzing the hydrolysis of NaBH<sub>4</sub> for 5 times in 150 mM NaBH<sub>4</sub> + 0.4 wt.% NaOH solution.

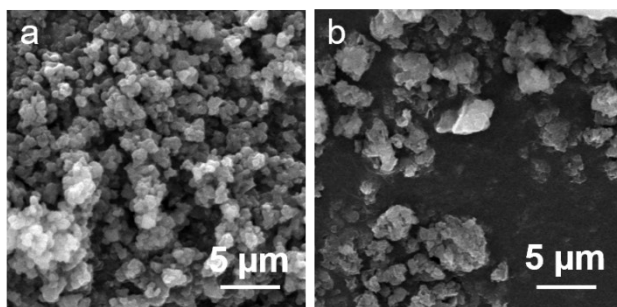

**Fig. S15.** SEM images of  $\text{Co}_2\text{B-MoO}_3/\text{MOF}$  (a) before and (b) after catalyzing the hydrolysis of  $\text{NaBH}_4$  for 5 times in 150 mM  $\text{NaBH}_4$  + 0.4 wt.%  $\text{NaOH}$  solution.

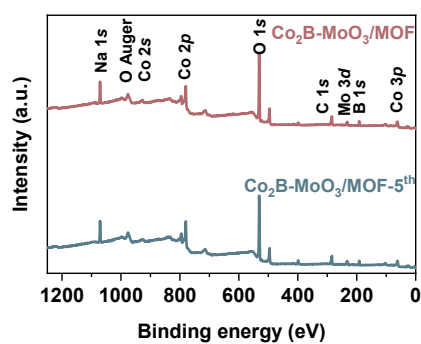

**Fig. S16.** XPS survey spectra of  $\text{Co}_2\text{B-MoO}_3/\text{MOF}$  and  $\text{Co}_2\text{B-MoO}_3/\text{MOF}$  catalyst after 5 test cycles.

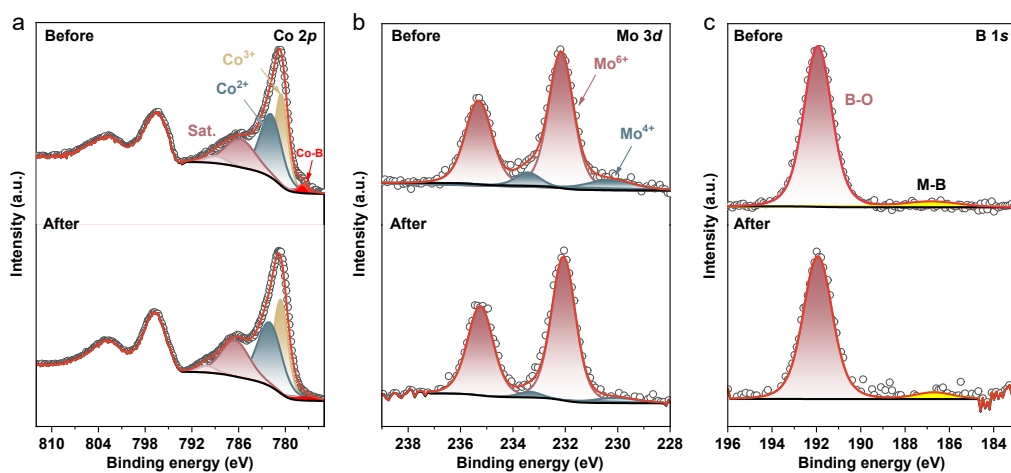

**Fig. S17.** Comparison of the high-resolution (a)  $\text{Co } 2p$ , (b)  $\text{Mo } 3d$ , (c)  $\text{B } 1s$  XPS spectrum of  $\text{Co}_2\text{B-MoO}_3/\text{MOF}$  catalysts after cycling for 5 times.

**Table S1.** Inductive coupled plasma mass spectroscopy (ICP-MS) results of Co<sub>2</sub>B-MoO<sub>3</sub>/MOF.

| <b>Catalysts</b>                                        | <b>Co (wt. %)</b> | <b>Mo (wt. %)</b> | <b>Molar ratio of<br/>Co/Mo</b> |
|---------------------------------------------------------|-------------------|-------------------|---------------------------------|
| Co <sub>2</sub> B-MoO <sub>3</sub> /MOF                 | 51.3              | 3.6               | 14.3/1                          |
| Co <sub>2</sub> B-MoO <sub>3</sub> /MOF-5 <sup>th</sup> | 82.6              | 4.2               | 19.6/1                          |

**Note:** The catalyst sample of 2.0 mg was weighed and dissolved in 8 mL aqua regia solution, followed by taking 80  $\mu$ L solution to 100 mL volumetric flask with a pipette and diluted to 200  $\mu$ g L<sup>-1</sup> before ICP testing. The standard solution of Co and Mo was purchased from commercial company and used directly.

**Table S2.** The summarized various parameters of catalysts that facilitate the production of H<sub>2</sub> through hydrolysis of NaBH<sub>4</sub>.

| Catalysts                                        | Specific rate<br>(mL min <sup>-1</sup> g <sub>cat</sub> <sup>-1</sup> ) | Activation energy<br>(kJ mol <sup>-1</sup> ) | Solute                                    | Temperature<br>(°C) |
|--------------------------------------------------|-------------------------------------------------------------------------|----------------------------------------------|-------------------------------------------|---------------------|
| Co <sub>2</sub> B-MoO <sub>3</sub> /MOF          | 6893.1                                                                  | 50.5                                         | 150 mM NaBH <sub>4</sub> + 0.4 wt.% NaOH  | 25                  |
| Co/CuFe <sub>2</sub> O <sub>4</sub> <sup>3</sup> | 2937                                                                    | 18.2                                         | 2 wt.% NaBH <sub>4</sub> + 4 wt.% NaOH    | 35                  |
| Co@NHC <sup>4</sup>                              | 1515.4                                                                  | 12.6                                         | 0.125 M NaBH <sub>4</sub> + 0.8 wt.% NaOH | 25                  |
| Co <sub>2</sub> B-Fe <sub>2</sub> B <sup>5</sup> | 5316                                                                    | 33.4                                         | 150 mM NaBH <sub>4</sub> + 0.4 wt.% NaOH  | 25                  |
| UiO-66 <sup>6</sup>                              | 6200                                                                    | N.A                                          | 0.05 M NaBH <sub>4</sub>                  | 30                  |
| Ru/ZIF-67 <sup>7</sup>                           | 5520                                                                    | N.A.                                         | 4.7 mg/mL NaBH <sub>4</sub>               | 30                  |
| CoWB/NF <sup>8</sup>                             | 14130                                                                   | 18.15                                        | 5 wt.% NaBH <sub>4</sub> + 2 wt.% NaOH    | 30                  |
| Co/Fe-BDC MOFs <sup>9</sup>                      | 1159                                                                    | N.A.                                         | 40 mg NaBH <sub>4</sub> + 10 mg NaOH      | 25                  |
| CoB <sup>10</sup>                                | 1486                                                                    | 21.4                                         | 5 wt.% NaBH <sub>4</sub> + 1 wt.% NaOH    | 30                  |
| Co-Ce-B <sup>11</sup>                            | 4760                                                                    | 33.1                                         | 1.5 wt.% NaBH <sub>4</sub> + 5 wt.% NaOH  | 30                  |
| Co@NMGC <sup>12</sup>                            | 3775                                                                    | 35.2                                         | 1.5 wt.% NaBH <sub>4</sub> + 1 wt.% NaOH  | 25±0.1              |
| Ru-Fe/GO <sup>13</sup>                           | 473                                                                     | 59.33                                        | 10 wt.% NaBH <sub>4</sub> + 1 wt.% NaOH   | 25                  |
| CoP nanosheet <sup>14</sup>                      | 6100                                                                    | 41                                           | 1 wt.% NaBH <sub>4</sub> + 2 wt.% NaOH    | 25                  |
| Ni/Au/Co <sup>15</sup>                           | N.A.                                                                    | 53.4                                         | 30 mM NaBH <sub>4</sub> , pH=12           | 20±0.5              |
| Fe-CoP/Ti <sup>16</sup>                          | 6060                                                                    | 47.8                                         | 1 wt.% NaBH <sub>4</sub> + 1 wt.% NaOH    | 25                  |
| Co-Cu-B <sup>17</sup>                            | 2120                                                                    | 30                                           | 2.5 wt.% NaBH <sub>4</sub> + 5 wt.% NaOH  | 25                  |
| RuO <sub>2</sub> -CoP <sup>18</sup>              | 10713                                                                   | 43.3                                         | 6 wt.% NaBH <sub>4</sub> + 4 wt.% NaOH    | 30                  |
| Co-B-P <sup>19</sup>                             | 3976                                                                    | 30.84                                        | 2.5 wt.% NaBH <sub>4</sub> + 5 wt.% NaOH  | 30                  |

## References

1. Z. Haiyang, L. Jie, L. Zhiqiang, S. Yayun, Z. Siyan, W. Junchuan, S. Ying, Z. Xueqin and L. Baoping, Influence of Co-MOF morphological modulation on its electrochemical performance, *J. Phys. Chem. Solids*, 2022, **160**, 110336.
2. D. Chen, R. Lu, R. Yu, Y. Dai, H. Zhao, D. Wu, P. Wang, J. Zhu, Z. Pu, L. Chen, J. Yu and S. Mu, Work-function-induced Interfacial Built-in Electric Fields in Os-OsSe<sub>2</sub> Heterostructures for Active Acidic and Alkaline Hydrogen Evolution, *Angew. Chem. Int.*

*Ed.*, 2022, **61**, e202208642.

3. F. Mirshafiee and M. Rezaei, Enhancing hydrogen generation from sodium borohydride hydrolysis and the role of a Co/CuFe<sub>2</sub>O<sub>4</sub> nanocatalyst in a continuous flow system, *Sci. Rep.*, 2024, **14**, 9659.
4. D. T. Tran, H. T. Van, L. H. Nguyen, N. Van Quang, Y.-c. Tsai, K.-Y. A. Lin and D. D. Tuan, Hierarchical porous cobalt nanoparticles encapsulated in heteroatom-doped hollow carbon as an enhancing multifunctional catalyst for hydrolysis of sodium borohydride and hydrogenation of bromate in water, *Surf. Interfaces*, 2024, **48**, 104329.
5. S. Zhou, L. Cheng, Y. Liu, J. Tian, C. Niu, W. Li, S. Xu, T. T. Isimjan and X. Yang, Highly active and robust catalyst: Co<sub>2</sub>B-Fe<sub>2</sub>B heterostructural nanosheets with abundant defects for hydrogen production, *Inorg. Chem.*, 2024, **63**, 2015-2023.
6. H. N. Abdelhamid, UiO-66 as a catalyst for hydrogen production via the hydrolysis of sodium borohydride, *Dalton Trans.*, 2020, **49**, 10851-10857.
7. D. D. Tuan and K.-Y. A. Lin, Ruthenium supported on ZIF-67 as an enhanced catalyst for hydrogen generation from hydrolysis of sodium borohydride, *Chem. Eng. J.*, 2018, **351**, 48-55.
8. Y. Wei, M. Wang, W. Fu, L. Wei, X. Zhao, X. Zhou, M. Ni and H. Wang, Highly active and durable catalyst for hydrogen generation by the NaBH<sub>4</sub> hydrolysis reaction: CoWB/NF nanodendrite with an acicular array structure, *J. Alloys Compd.*, 2020, **836**, 155429.
9. M. Alaide de Oliveira, E. Silva Souza, J. de Jesus Santana, N. Łukasik, B. Stefany Lima da Silva, B. Silva Barros and J. Kulesza, M-BDC (M = Co and/ or Fe) MOFs as effective catalysts for hydrogen generation via hydrolysis of sodium borohydride, *Appl. Surf. Sci.*, 2023, **628**, 157361.
10. N. Selvitepe, A. Balbay and C. Saka, Optimisation of sepiolite clay with phosphoric acid treatment as support material for CoB catalyst and application to produce hydrogen from the NaBH<sub>4</sub> hydrolysis, *Int. J. Hydrogen Energy*, 2019, **44**, 16387-16399.
11. Y. Zou, Y. Yin, Y. Gao, C. Xiang, H. Chu, S. Qiu, E. Yan, F. Xu and L. Sun, Chitosan-mediated Co-Ce-B nanoparticles for catalyzing the hydrolysis of sodium borohydride, *Int. J. Hydrogen Energy*, 2018, **43**, 4912-4921.

12. J. Li, X. Hong, Y. Wang, Y. Luo, P. Huang, B. Li, K. Zhang, Y. Zou, L. Sun, F. Xu, F. Rosei, S. P. Verevkin and A. A. Pimerzin, Encapsulated cobalt nanoparticles as a recoverable catalyst for the hydrolysis of sodium borohydride, *Energy Stor. Mater.*, 2020, **27**, 187-197.
13. Y. Zhang, J. Zou, Y. Luo and F. Wang, Study on preparation and performance of Ru-Fe/GO catalyst for sodium borohydride alcoholysis to produce hydrogen, *Fullerenes, Nanotubes Carbon Nanostruct.*, 2020, **28**, 786-793.
14. T. Liu, K. Wang, G. Du, A. M. Asiri and X. Sun, Self-supported CoP nanosheet arrays: a non-precious metal catalyst for efficient hydrogen generation from alkaline NaBH<sub>4</sub> solution, *J. Mater. Chem. A*, 2016, **4**, 13053-13057.
15. C. Jiao, Z. Huang, X. Wang, H. Zhang, L. Lu and S. Zhang, Synthesis of Ni/Au/Co trimetallic nanoparticles and their catalytic activity for hydrogen generation from alkaline sodium borohydride aqueous solution, *RSC Adv.*, 2015, **5**, 34364-34371.
16. C. Tang, R. Zhang, W. Lu, L. He, X. Jiang, A. M. Asiri and X. Sun, Fe-doped CoP nanoarray: a monolithic multifunctional catalyst for highly efficient hydrogen generation, *Adv. Mater.*, 2017, **29**, 1602441.
17. M. S. İzgi, Ö. Şahin and C. Saka, Hydrogen production from NaBH<sub>4</sub> using Co-Cu-B catalysts prepared in methanol: Effect of plasma treatment, *Int. J. Hydrogen Energy*, 2016, **41**, 1600-1608.
18. S. Ye, Y. Wang, C. Wang, L. Cheng, L. Sun and P. Yan, Robust cellulose fiber/fibrous sepiolite coated RuO<sub>2</sub>-CoP aerogel as monolithic catalyst for hydrogen generation via NaBH<sub>4</sub> hydrolysis, *J. Colloid Interface Sci.*, 2023, **639**, 284-291.
19. Ö. Şahin, D. E. Karakaş, M. Kaya and C. Saka, The effects of plasma treatment on electrochemical activity of Co-B-P catalyst for hydrogen production by hydrolysis of NaBH<sub>4</sub>, *J. Energy Inst.*, 2017, **90**, 466-475.
